# Supplementary material
Source: PubMed Central journal article supplement (PMC4528364)

Figure 1c

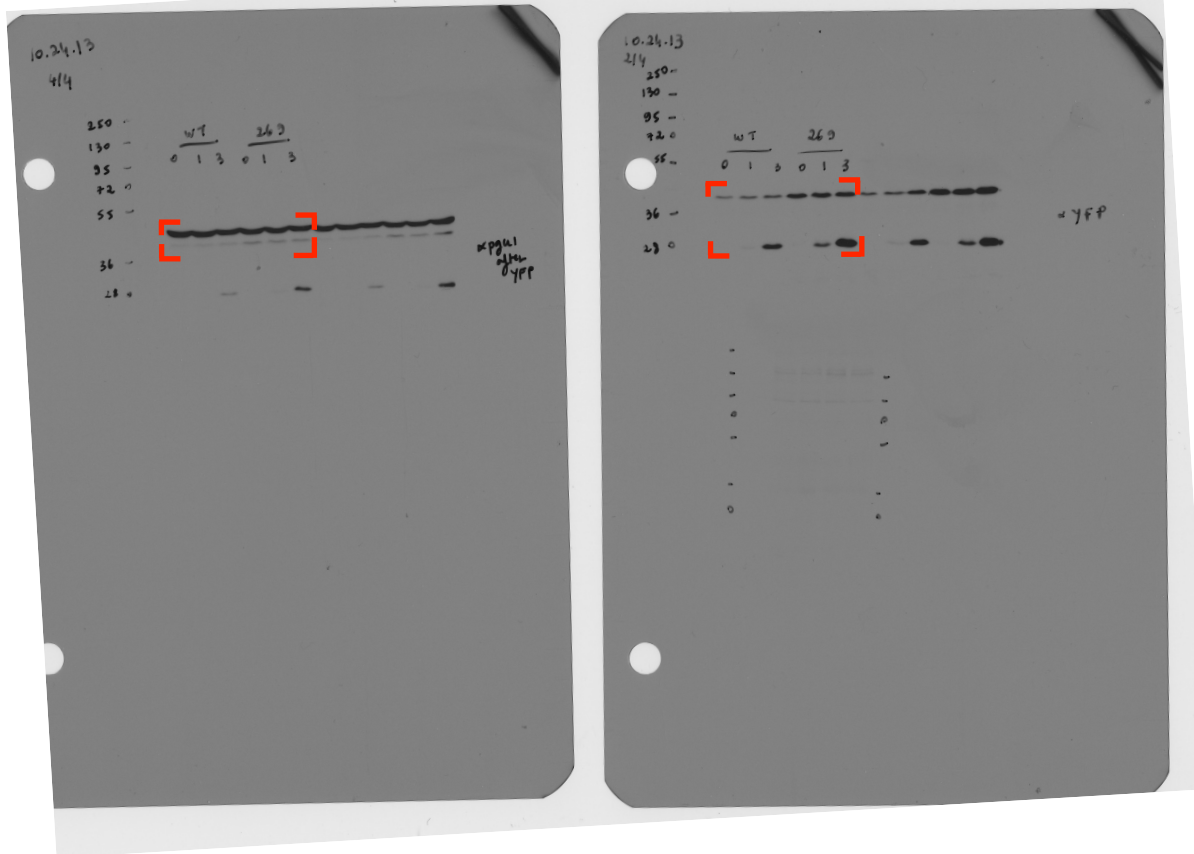

Figure 1d

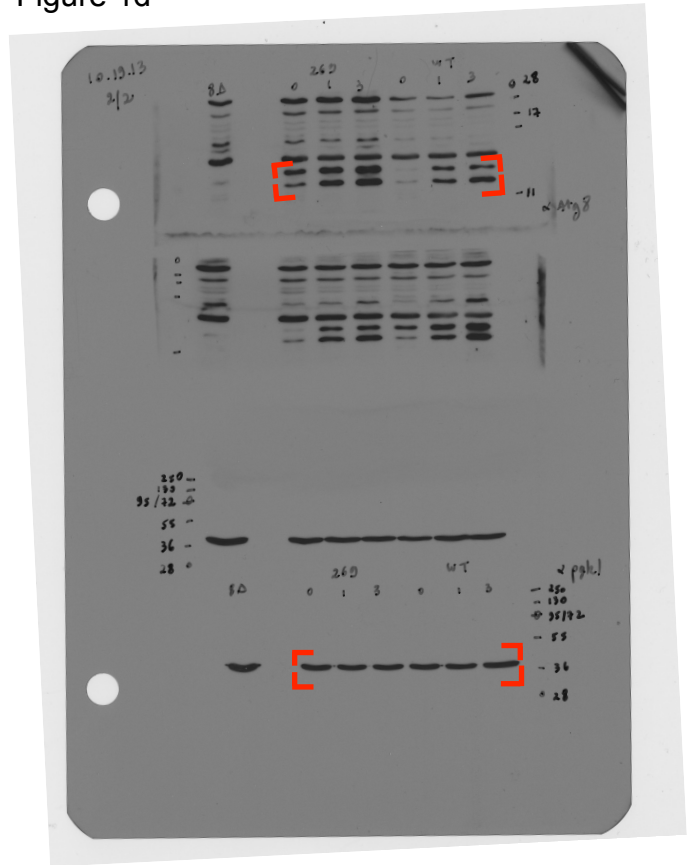

Figure 1g

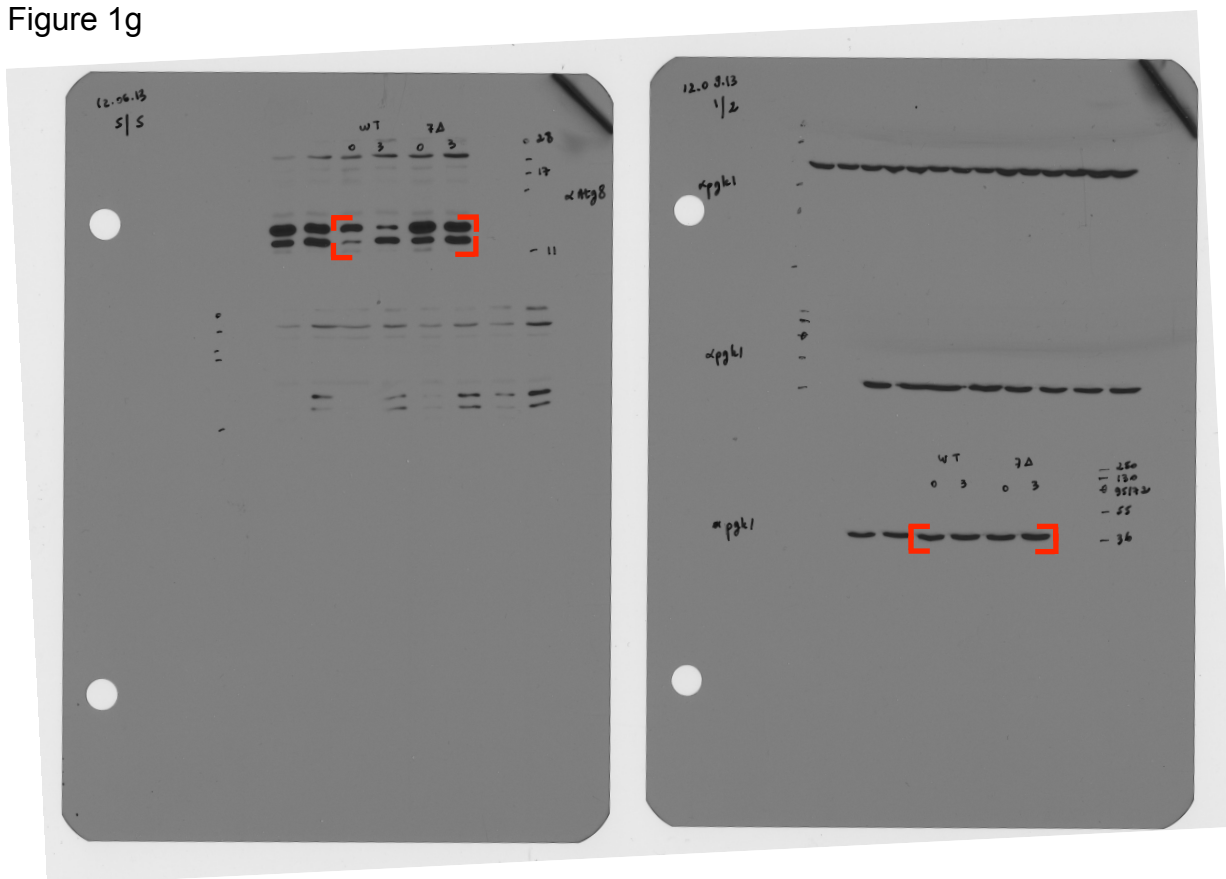

Figure 1f

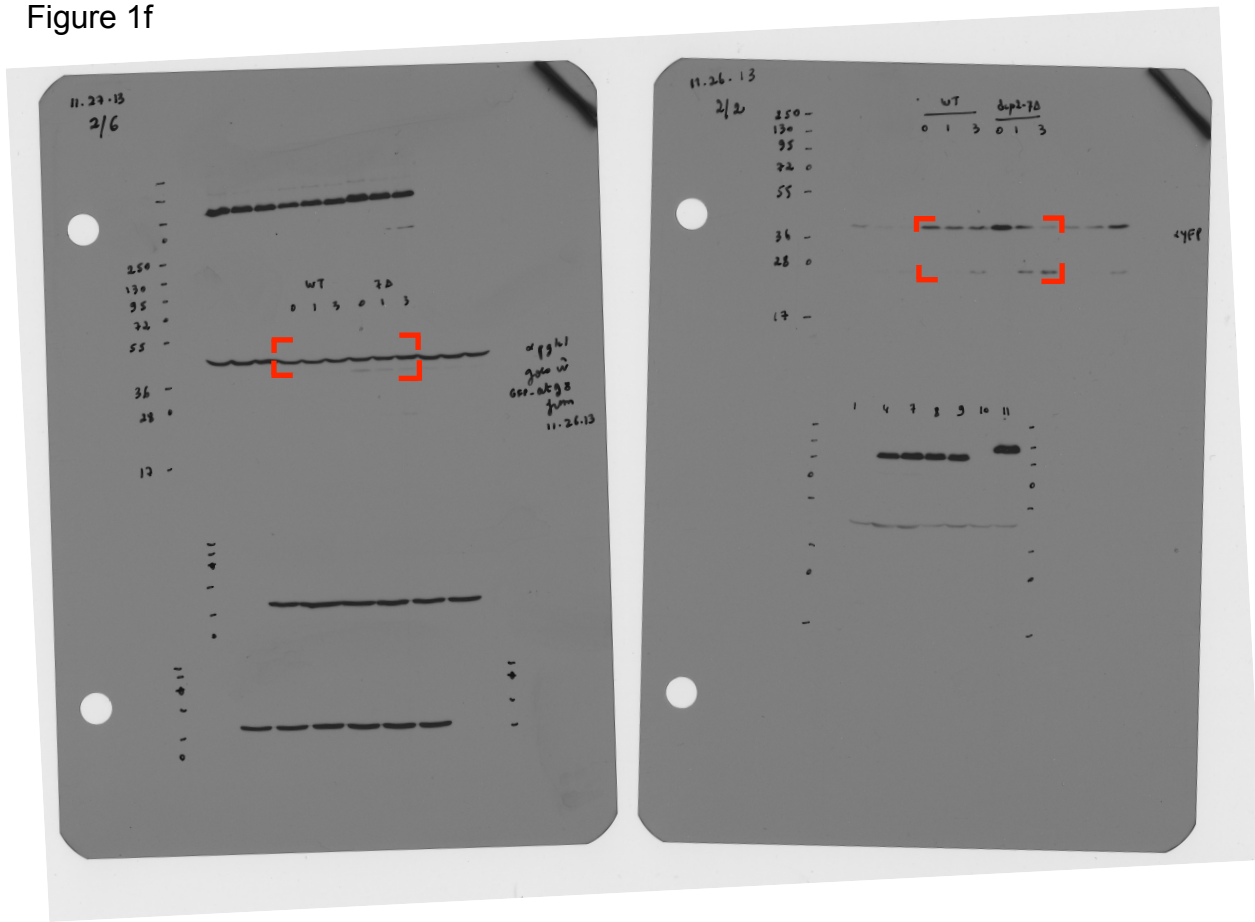

Supplementary  
Figure 1c

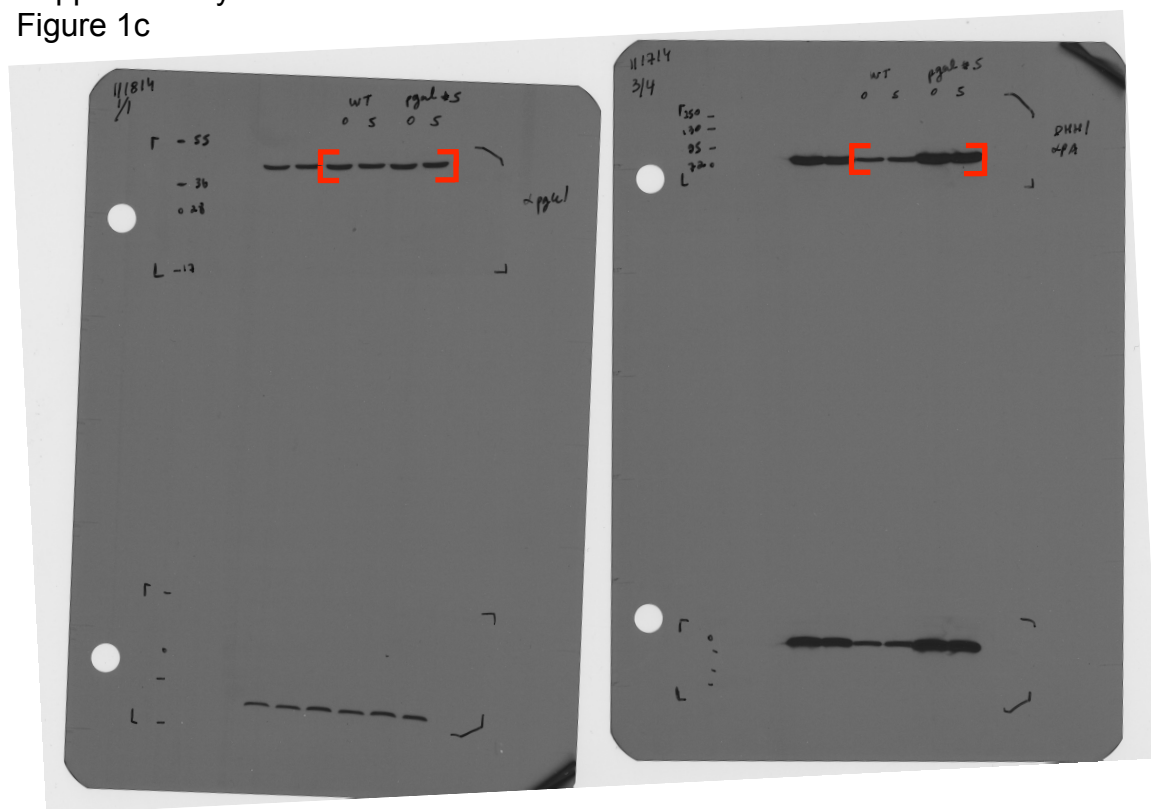

Supplementary  
Figure 1g

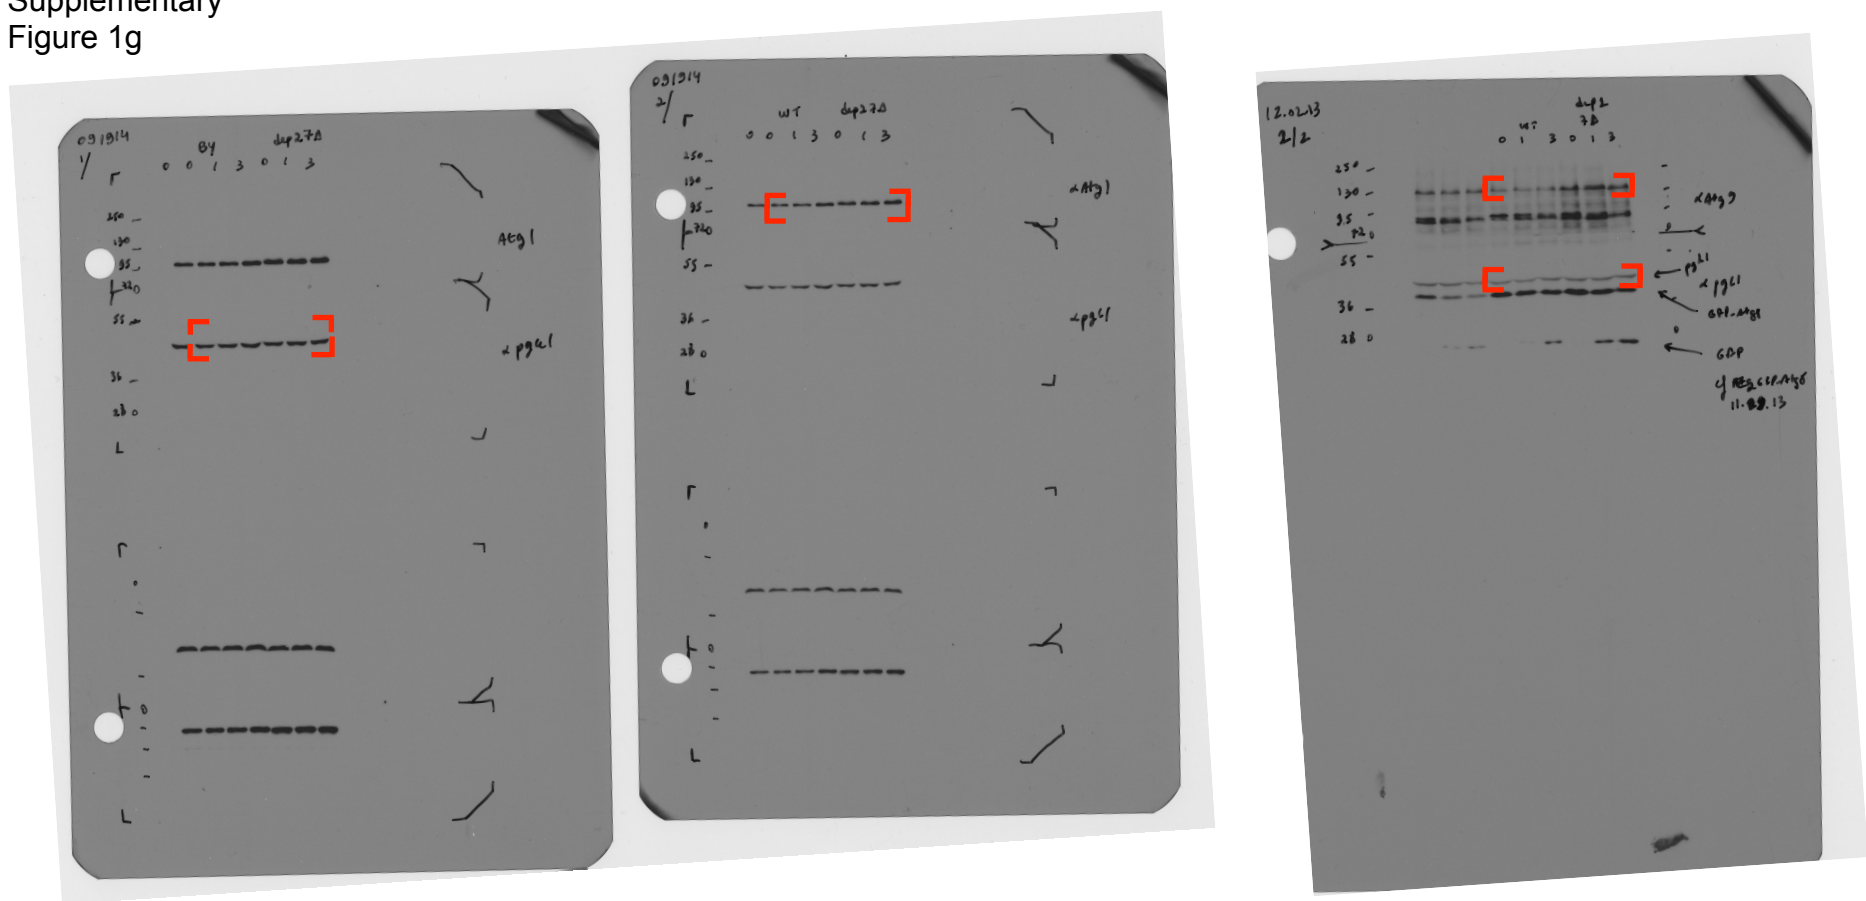

Figure 3C

KODAK MI Standard Edition™ ATG8

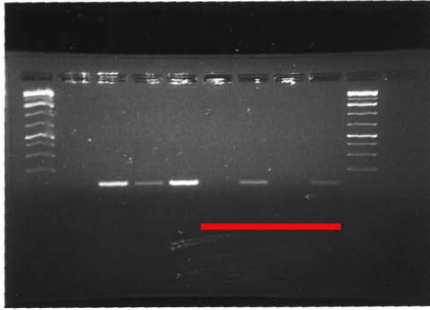

ATG8

KODAK MI Standard Edition™ Vad1-myc RIP-Rap 3 h

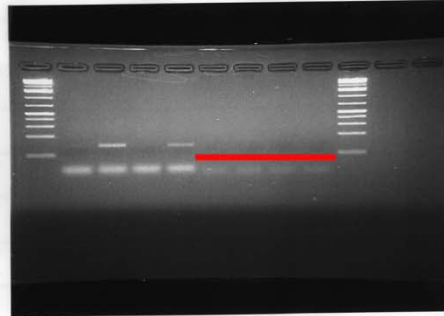

ATG8 ACT1

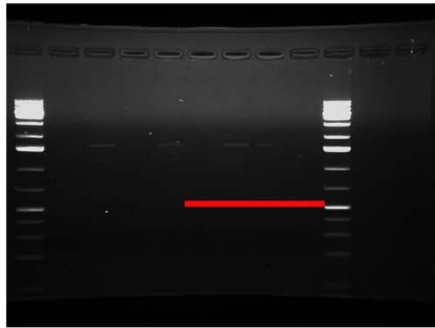

ATG3

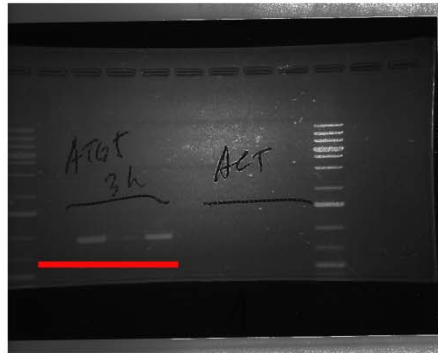

ATG5

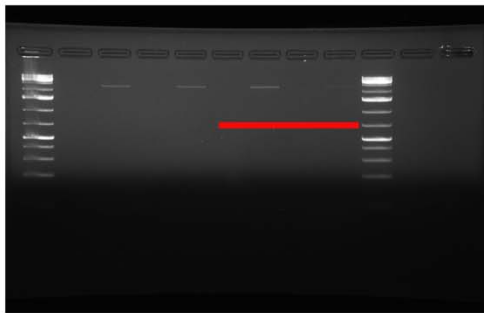

ATG9

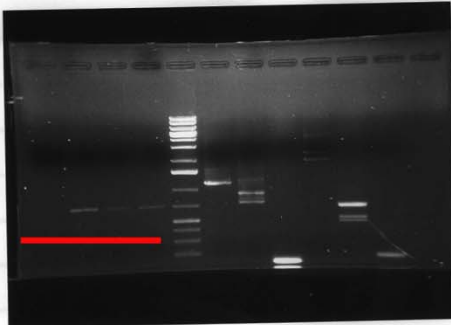

ATG22

KODAK MI Standard Edition™ dot 30 sec

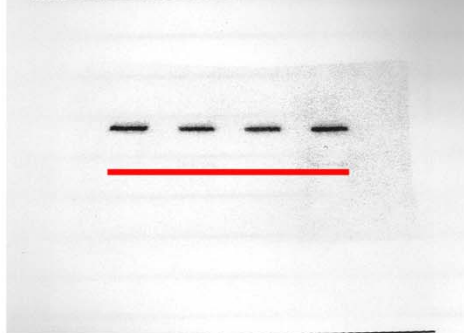

Pre

KODAK MI Standard Edition™ DDX6-1st

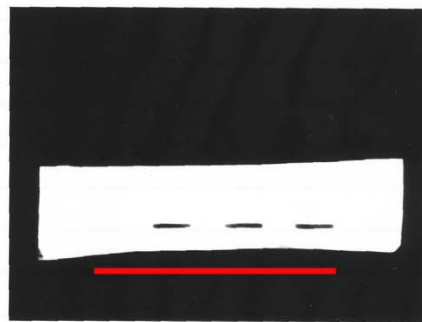

Post

Figure 5e, right panels.

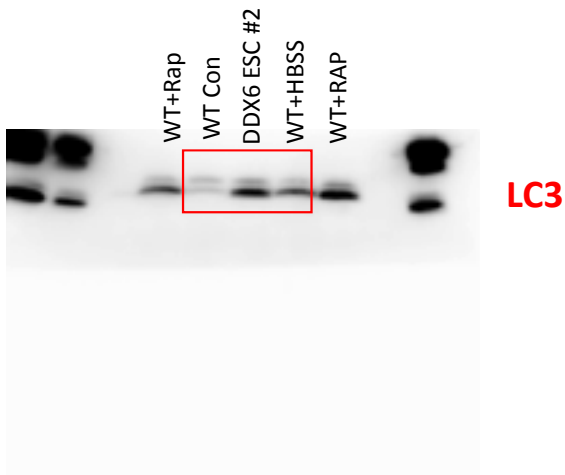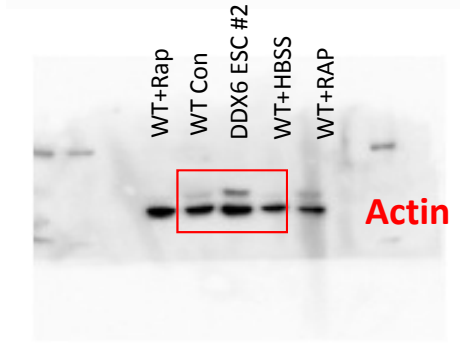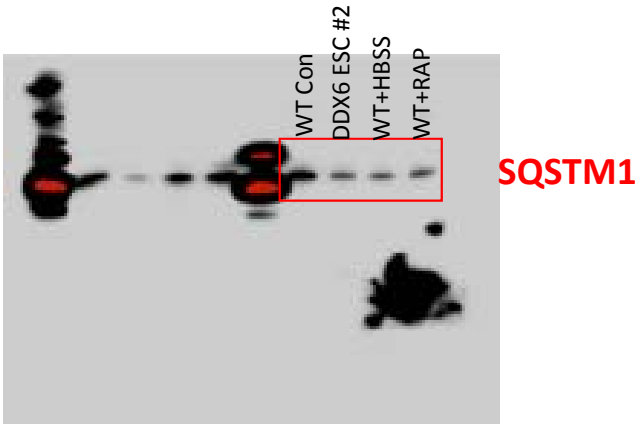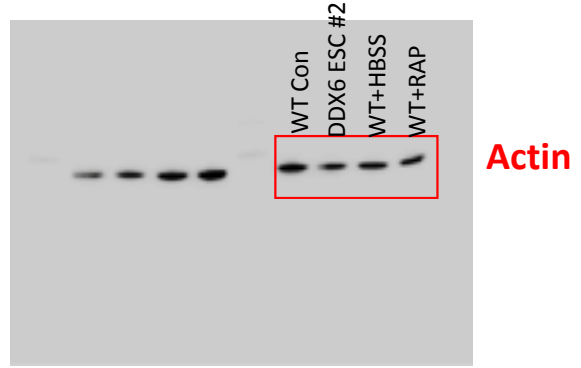

Figure 6h, right panels.

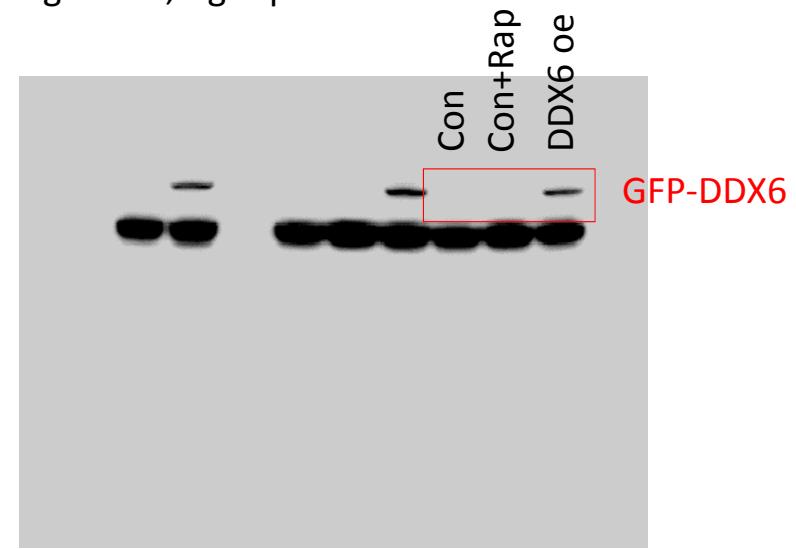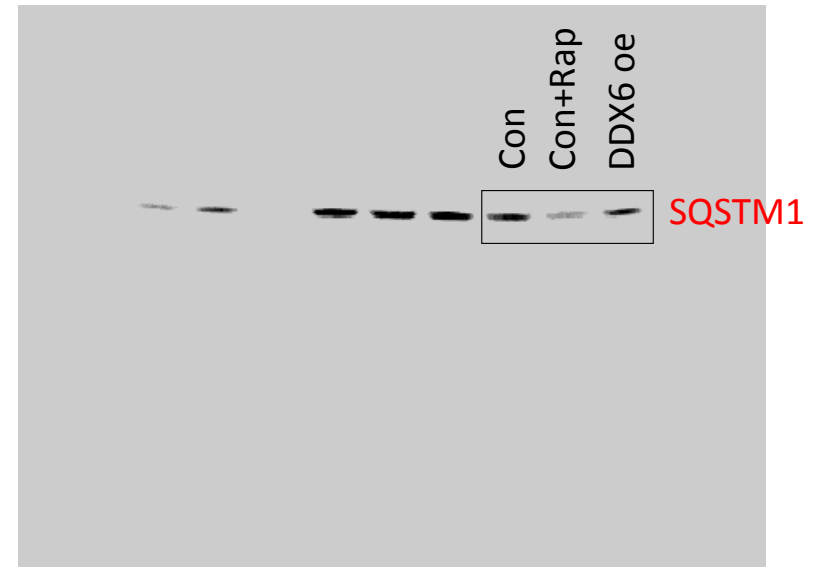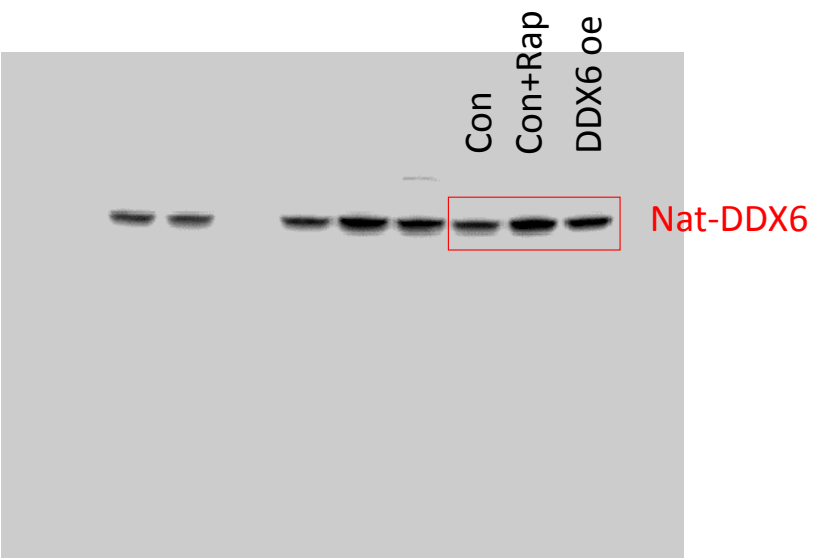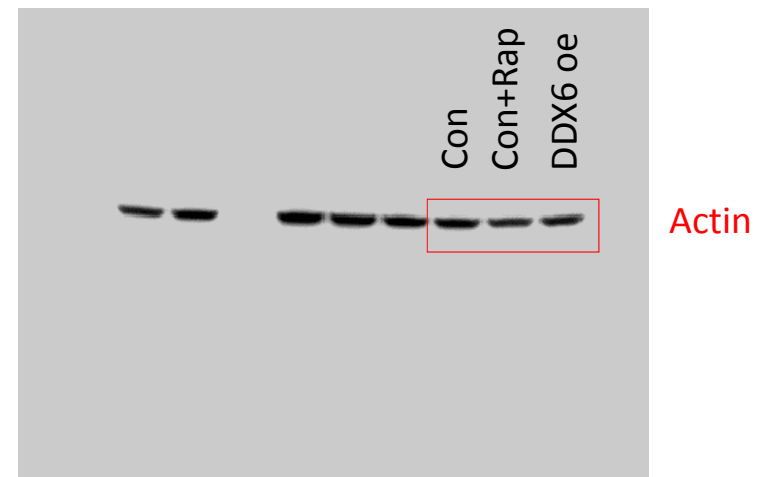



For Figure 7f

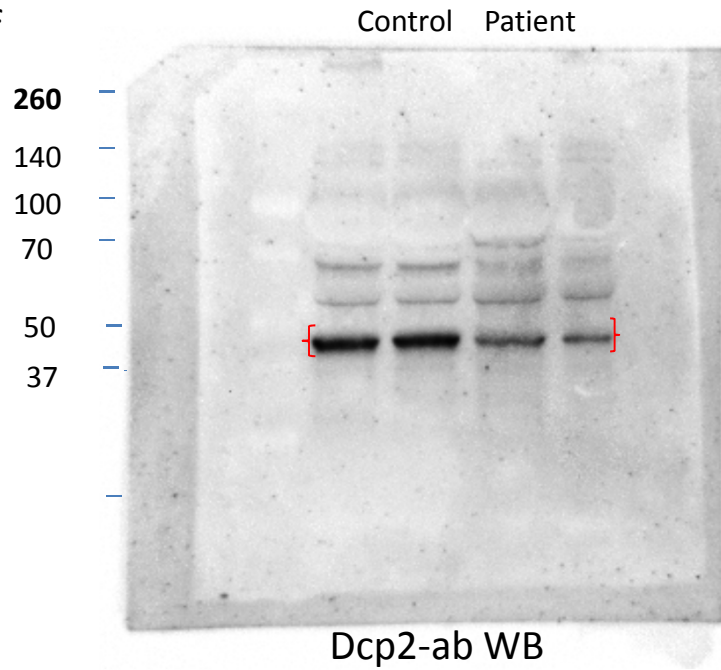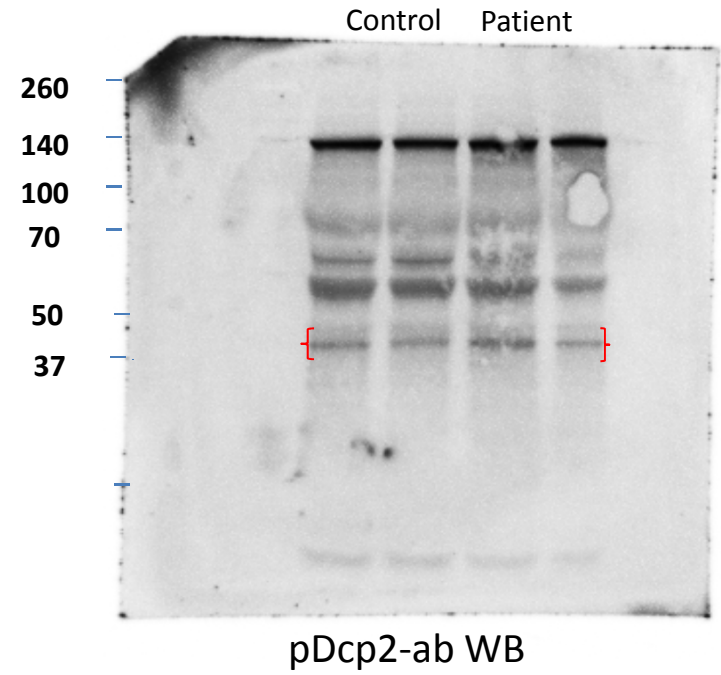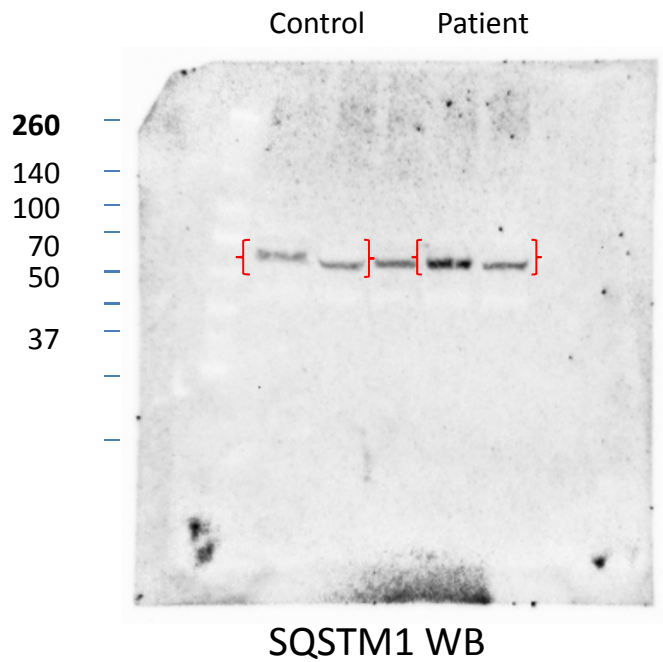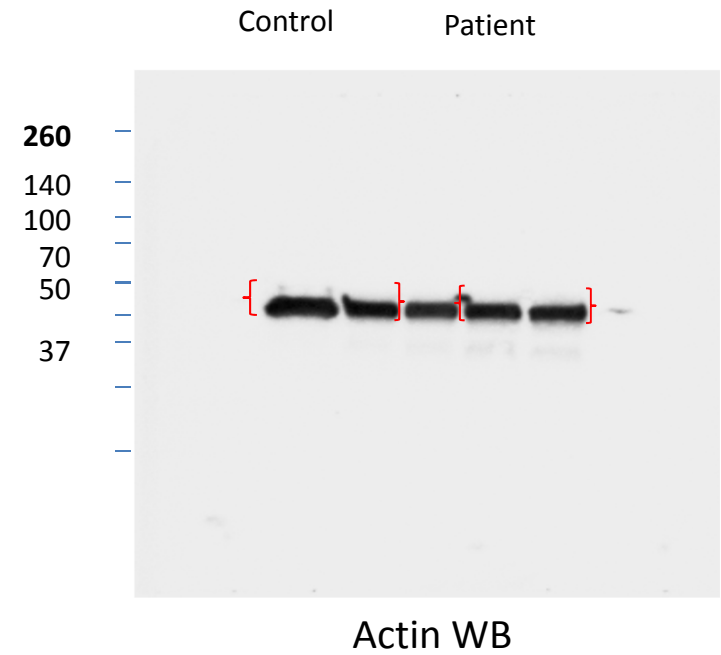

Supp Fig. 7: In vitro mTor assay

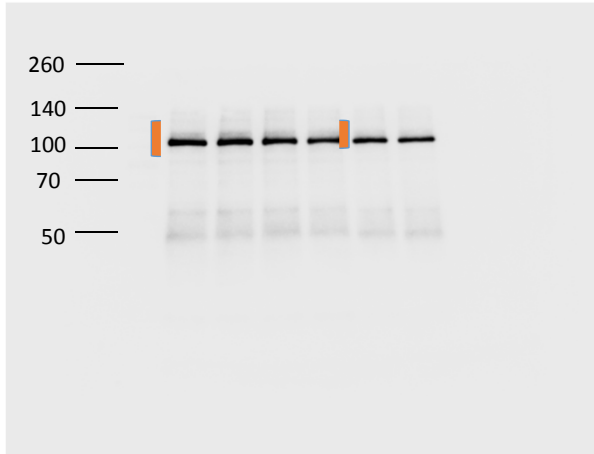

Supp Fig. 7: In vitro

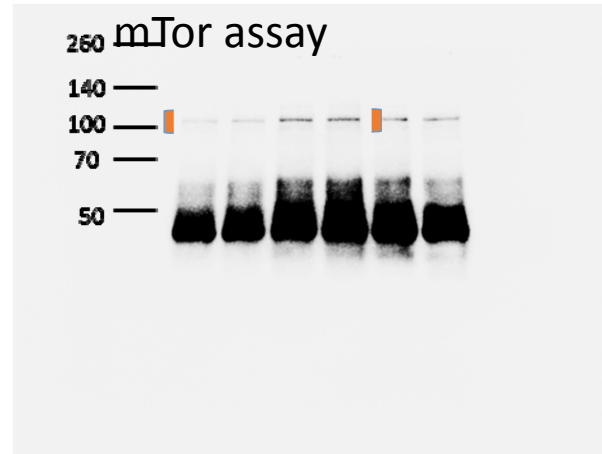

Fig.4C:3XFLAG Dcp2 IP

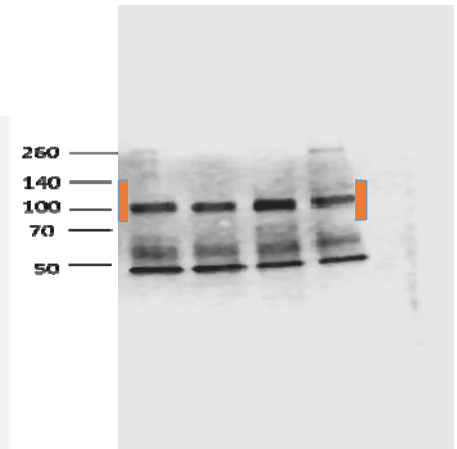

Supp.Fig.2b VAD1 Overexpression

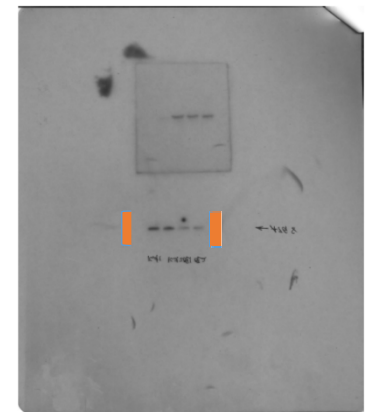

Supp Fig.7:+CiAP-phospho-Dcp2 Ab

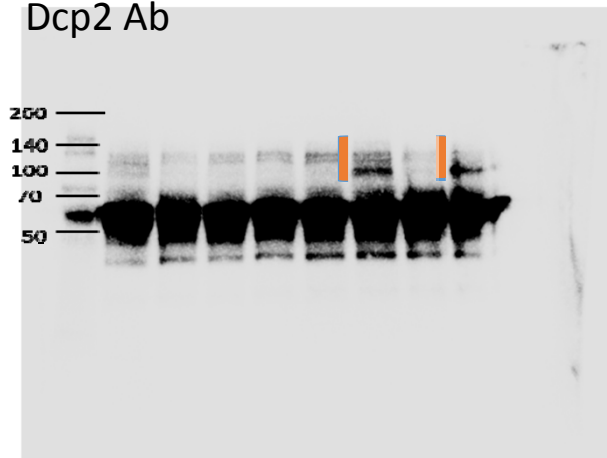

Supp Fig.7:+CiAP-Dcp2 Ab

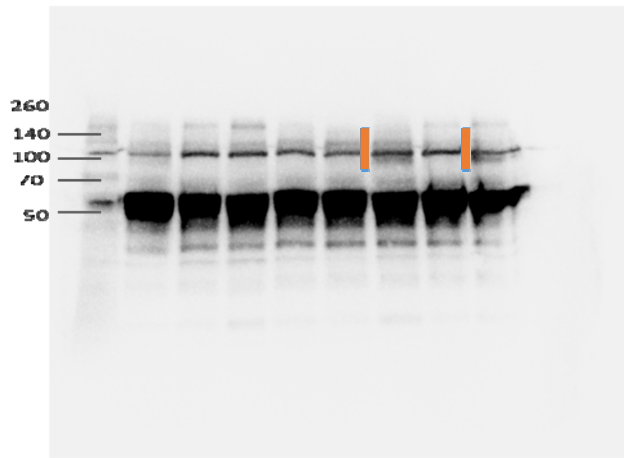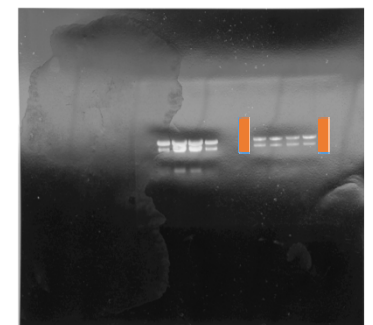

Supplement: NIHMS692013-supplement-9.pdf [file NIHMS692013-supplement-9.pdf]
